# Supplementary material for: DNA Probes for Cas12a-Based Assay with Fluorescence Anisotropy Enhanced Due to Anchors and Salts
Source: MDPI journal article supplement (doi:10.3390/bios13121034), 2023-12-16
Supplement: s1 [file s1]

Supplementary Material

# DNA Probes for Cas12a-Based Assay with Fluorescence Anisotropy Enhanced due to Anchors and Salts

Irina V. Safenkova<sup>1</sup>, Alexey V. Samokhvalov<sup>1</sup>, Kseniya V. Serebrennikova<sup>1</sup>, Sergei A. Eremin<sup>1,2</sup>, Anatoly V. Zherdev<sup>1</sup> and Boris B. Dzantiev<sup>1,\*</sup>

<sup>1</sup>A.N. Bach Institute of Biochemistry, Research Centre of Biotechnology of the Russian Academy of Sciences, 119071 Moscow, Russia; safenkova@inbi.ras.ru (I.V.S.); a.samokhvalov@fbras.ru (A.V.S.); ksenijasereb@mail.ru (K.V.S.); eremin-fbras@yandex.ru (S.A.E); zherdev@inbi.ras.ru (A.V.Z.); dzantiev@inbi.ras.ru (B.B.D.)

<sup>2</sup>Faculty of Chemistry, M.V. Lomonosov Moscow State University, Moscow 119991, Russia

\* Correspondence: dzantiev@inbi.ras.ru; Tel.: +7-495-954-2804

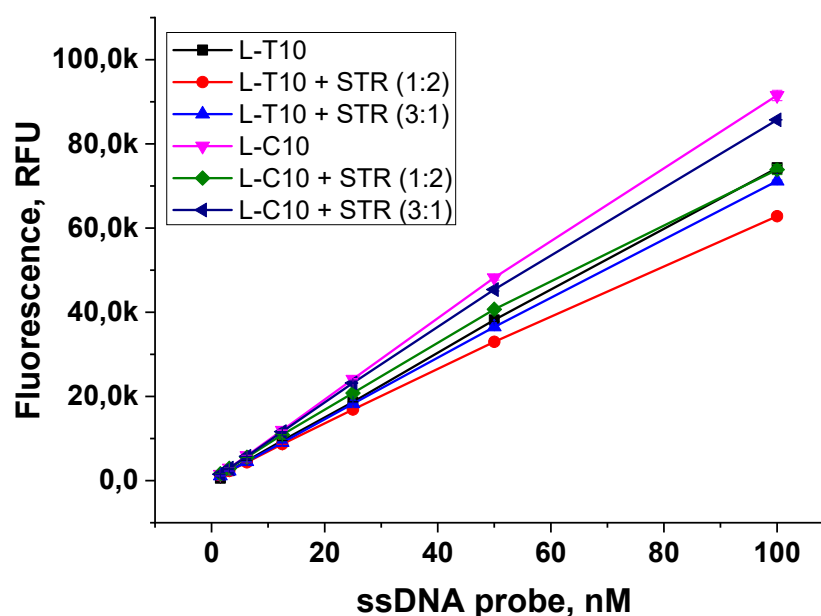

**Figure S1.** Dependences of fluorescence on ssDNA concentration in the absence of streptavidin (STR), as well as at molar ratios of probe : STR of 1:2 and 3:1. Experiments were carried out in 20mM Tris-HCl buffer, pH 9.

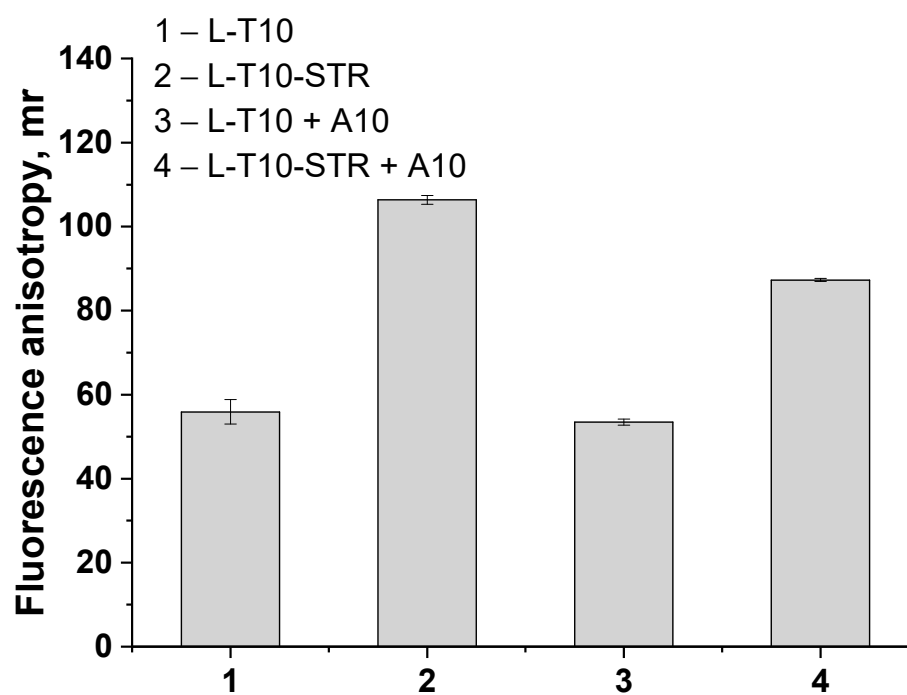

**Figure S2.** Comparison of the fluorescence anisotropy of probe L-T10 and STR – L-T10 before and after interaction with A10. Experiments were carried out in 20 mM Tris-HCl buffer containing 10 mM  $Mg^{2+}$ , pH 9.

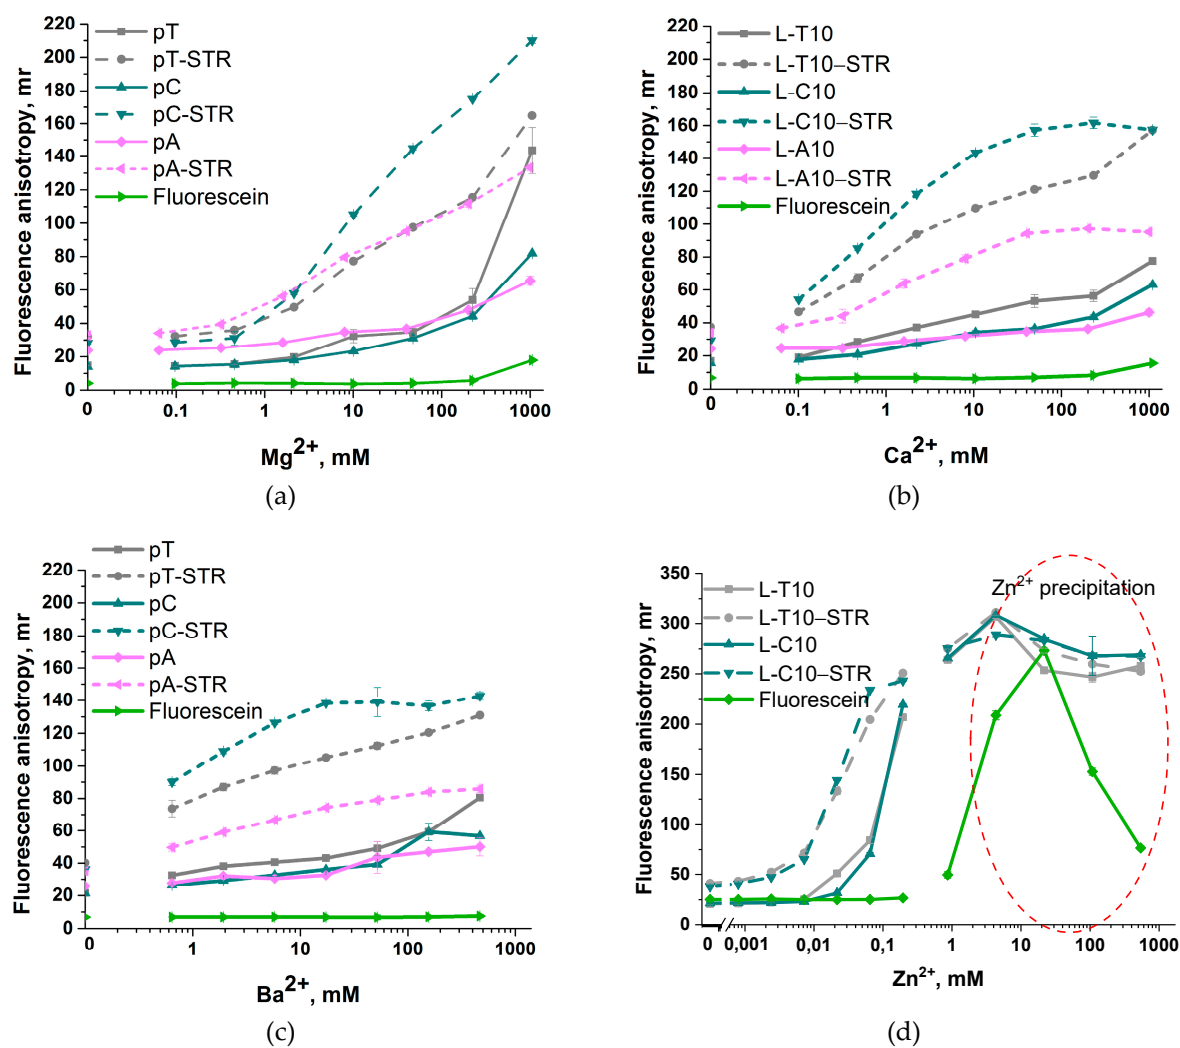

**Figure S3.** Fluorescence anisotropy of L-T10, L-C10, L-A10 and their conjugates with streptavidin anchor at 1:2 molar ratio depending on the concentration of Mg<sup>2+</sup> (a), Ca<sup>2+</sup> (b), Ba<sup>2+</sup> (c), and Zn<sup>2+</sup> (d) in 50mM Tris-HCl, pH 9.

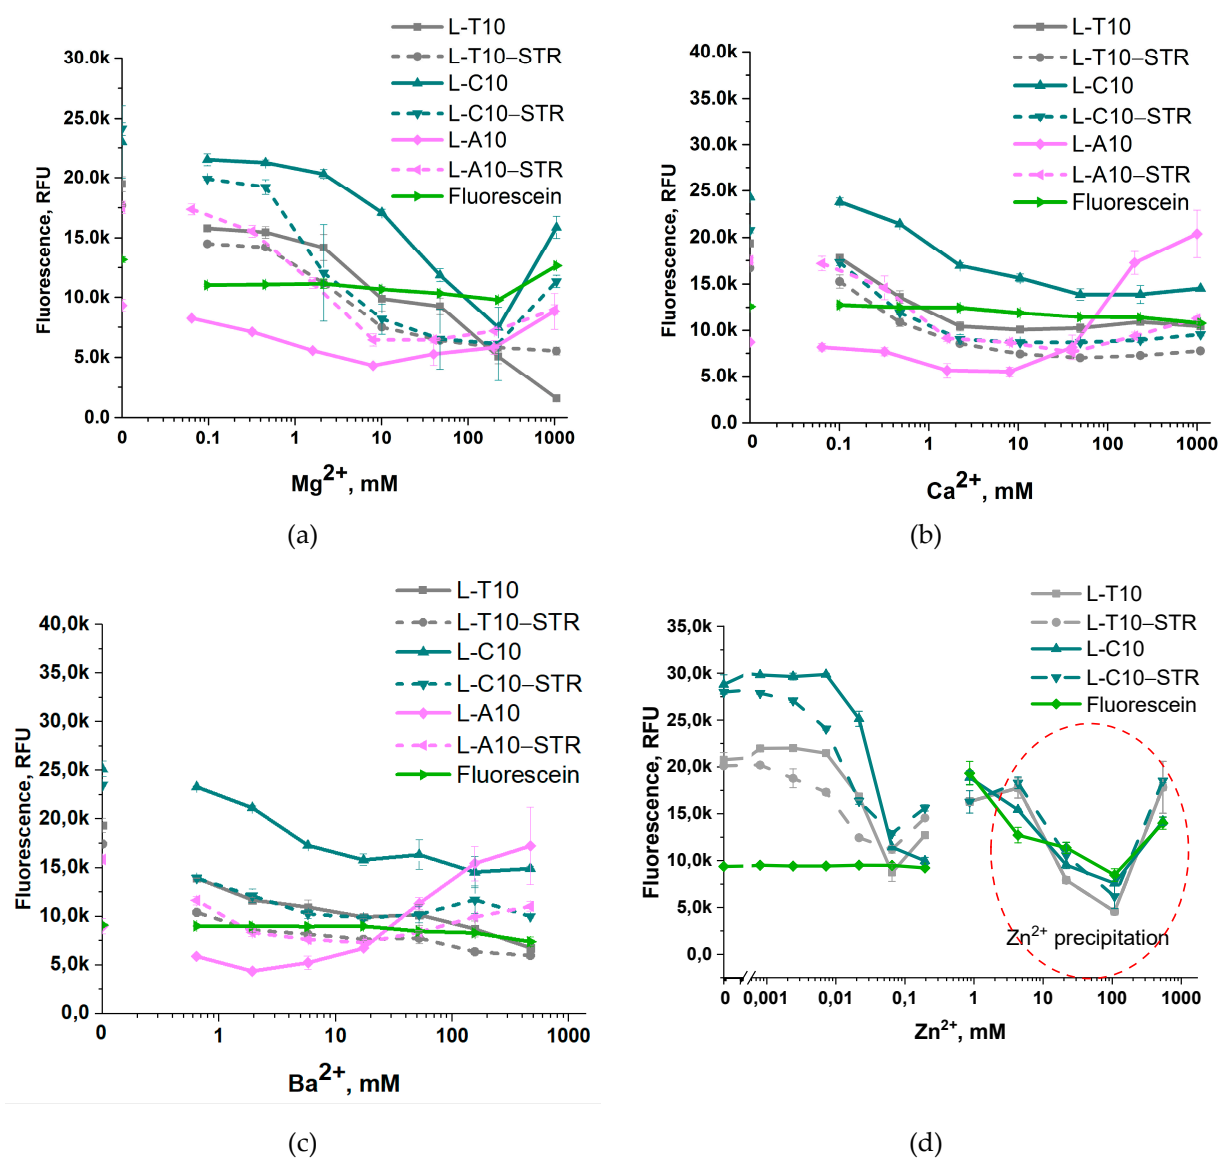

**Figure S4.** Fluorescence of L-T10, L-C10, L-A10 and their conjugates with streptavidin anchor at 1:2 molar ratio depending on the concentration of Mg<sup>2+</sup> (a), Ca<sup>2+</sup> (b), Ba<sup>2+</sup> (c), and Zn<sup>2+</sup> (d) in 50mM Tris-HCl, pH 9.

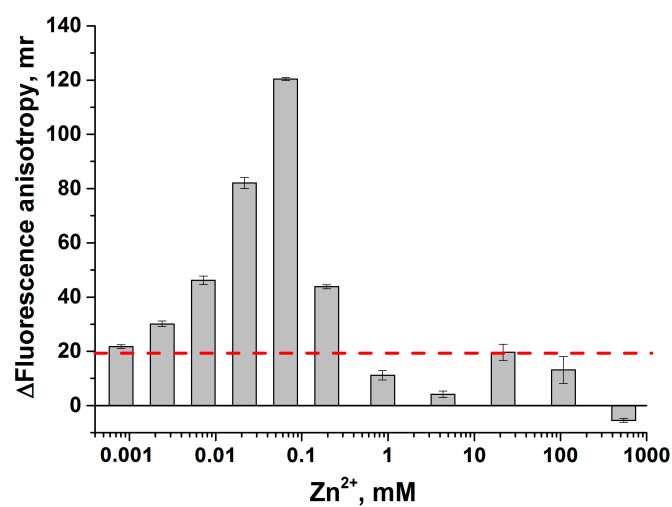

a

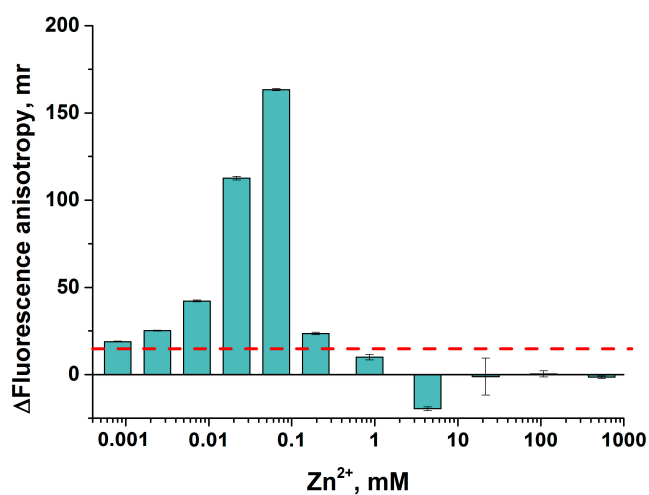

b.

**Figure S5.** Fluorescence anisotropy difference between STR-probe and probe at different concentrations of  $Zn^{2+}$ . (a) For L-T10 probe, (b) for L-C10 probe. The dashed line indicates  $\Delta$ FA in the absence of  $Zn^{2+}$ .

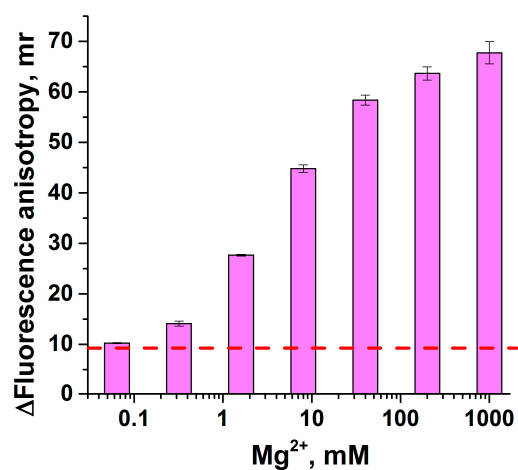

(a)

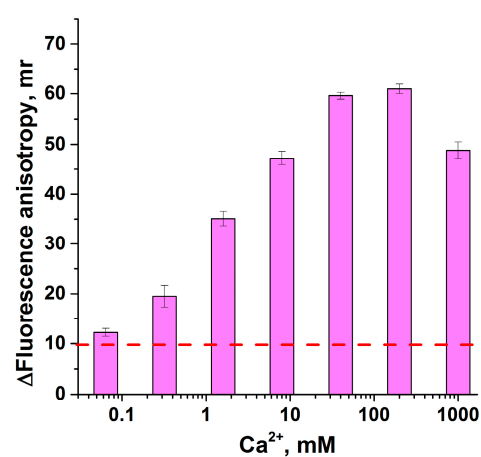

(b)

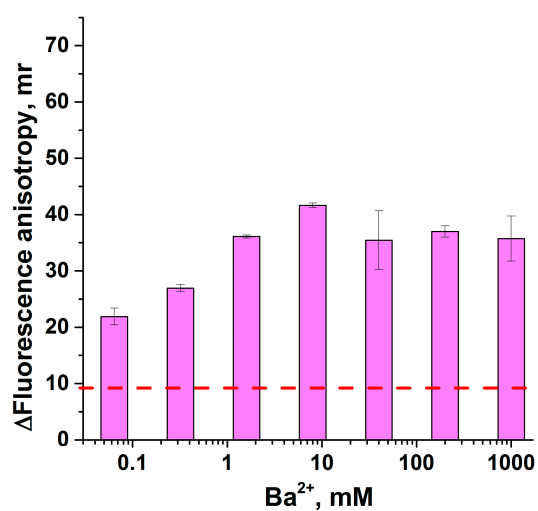

(c)

**Figure S6.** Impact of divalent metal ions on fluorescence anisotropy (FA) of L-A10 probe and probe with STR. The difference in FA of SRT-probe and probe on the concentration of Mg<sup>2+</sup> (a), Ca<sup>2+</sup> (b), and Ba<sup>2+</sup> (c). The dashed lines indicate ΔFA in the absence of Me<sup>2+</sup>.

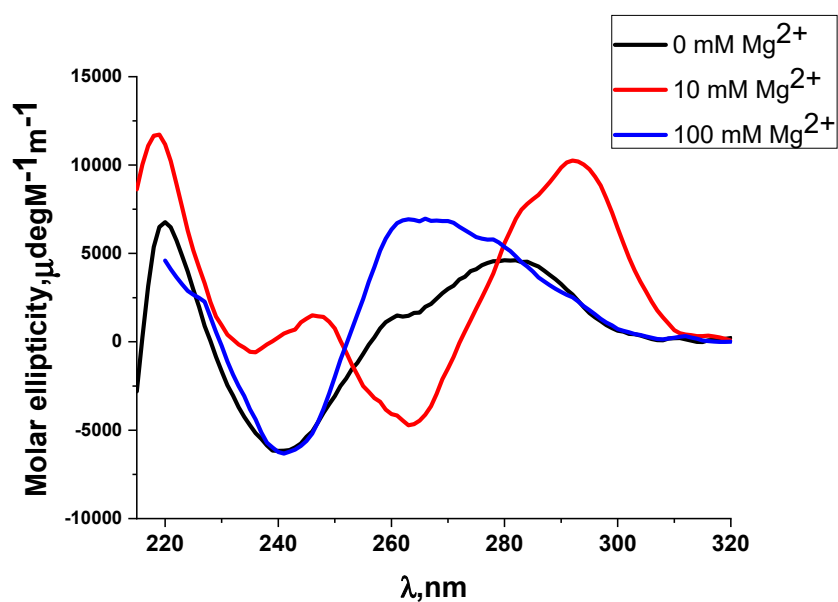

**Figure S7.** CD spectra of G-quadruplex carried out in 50mM Tris-HCl buffer, pH 9 at different concentrations of  $\text{Mg}(\text{CH}_3\text{COO})_2$ . The reagent concentrations are 1  $\mu\text{M}$  for all spectra.

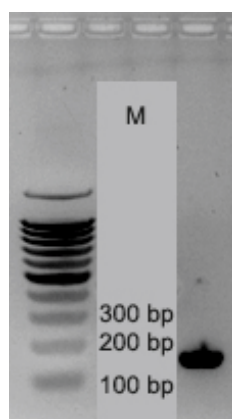

**Figure S8.** Scan of gel electrophoresis in 2% agarose gel of fragment of target AMY1267 gene of *Erwinia amylovora*. M – dsDNA ladder.

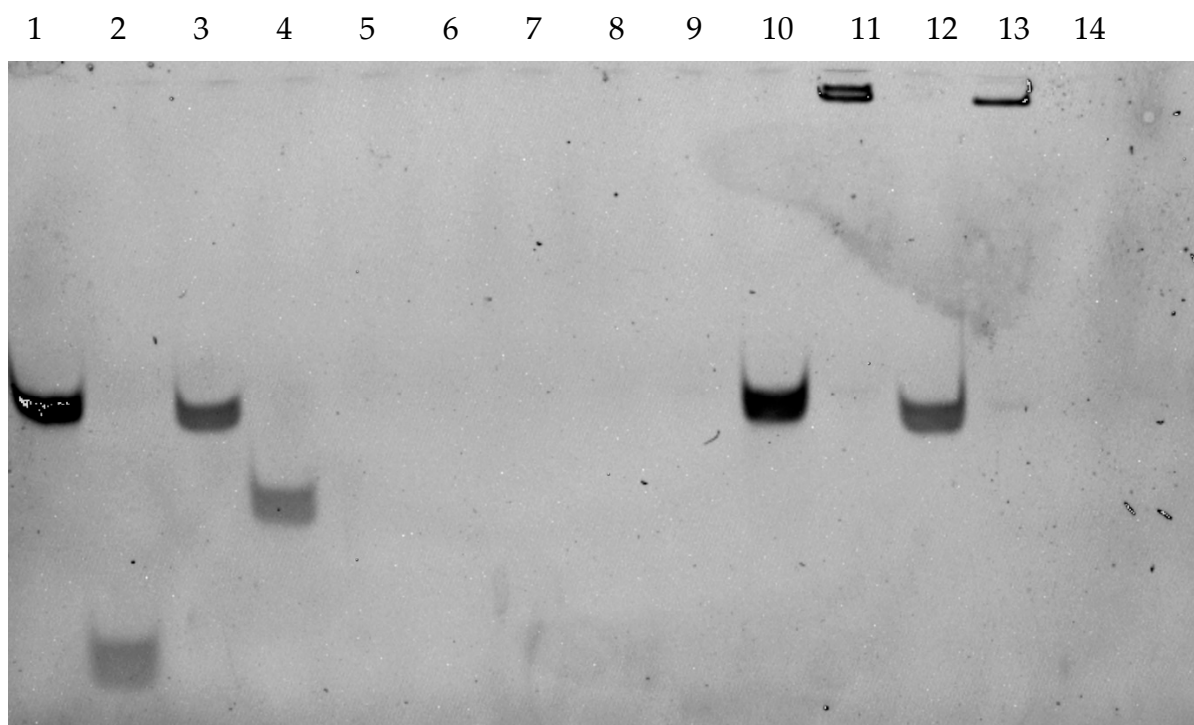

**Figure S9.** Scan of polyacrylamide gel after electrophoresis of ssDNA probes (1 – G-quadruplex, 2 – L -C10, 3 – H-R21, 4 – H-C10), mixtures after Cas12a-based assay with 10 nM dsDNA and ssDNA probes (5 – G-quadruplex, 6 – L -C10 + STR after assay, 7 – H-R21, 8 – H-C10 + STR before assay, 9 – without probe), mixtures after Cas12a-based assay without dsDNA and with ssDNA probes (10 – G-quadruplex, 11 – L -C10 + STR after assay, 12 – H-R21, 13 – H-C10 + STR before assay, 14 – without probe).

**Table S1.** Sequences of primers and guide RNA used in this research.

| Name  | Sequence 5'-3'                                  | Purpose                                     |
|-------|-------------------------------------------------|---------------------------------------------|
| F-PCR | CCGTGGAGACCGATCTTTTA                            | Forward primer for PCR                      |
| R-PCR | AAGTTTCTCCGCCCTACGAT                            | Reverse primer for PCR                      |
| F-RPA | GCTCTCATTGCCGTGGAGACCGATCTTTTA                  | Forward primer for RPA                      |
| R-RPA | TTATAACAAAAGTTTCTCCGCCCTACGAT                   | Reverse primer for RPA<br>primer R          |
| gRNA  | UAAUUUCUACUAAGUGUAGAUAGAGAG<br>GCAGCAUUCGACGAAC | gRNA for <i>E. amylovora</i><br>recognition |
